# Supplementary material for: Mining Potential Drug Targets and Constructing Diagnostic Models for Heart Failure Based on miRNA-mRNA Networks
Source: Hindawi journal article supplement (doi:10.1155/2022/9652169), 2022-09-27

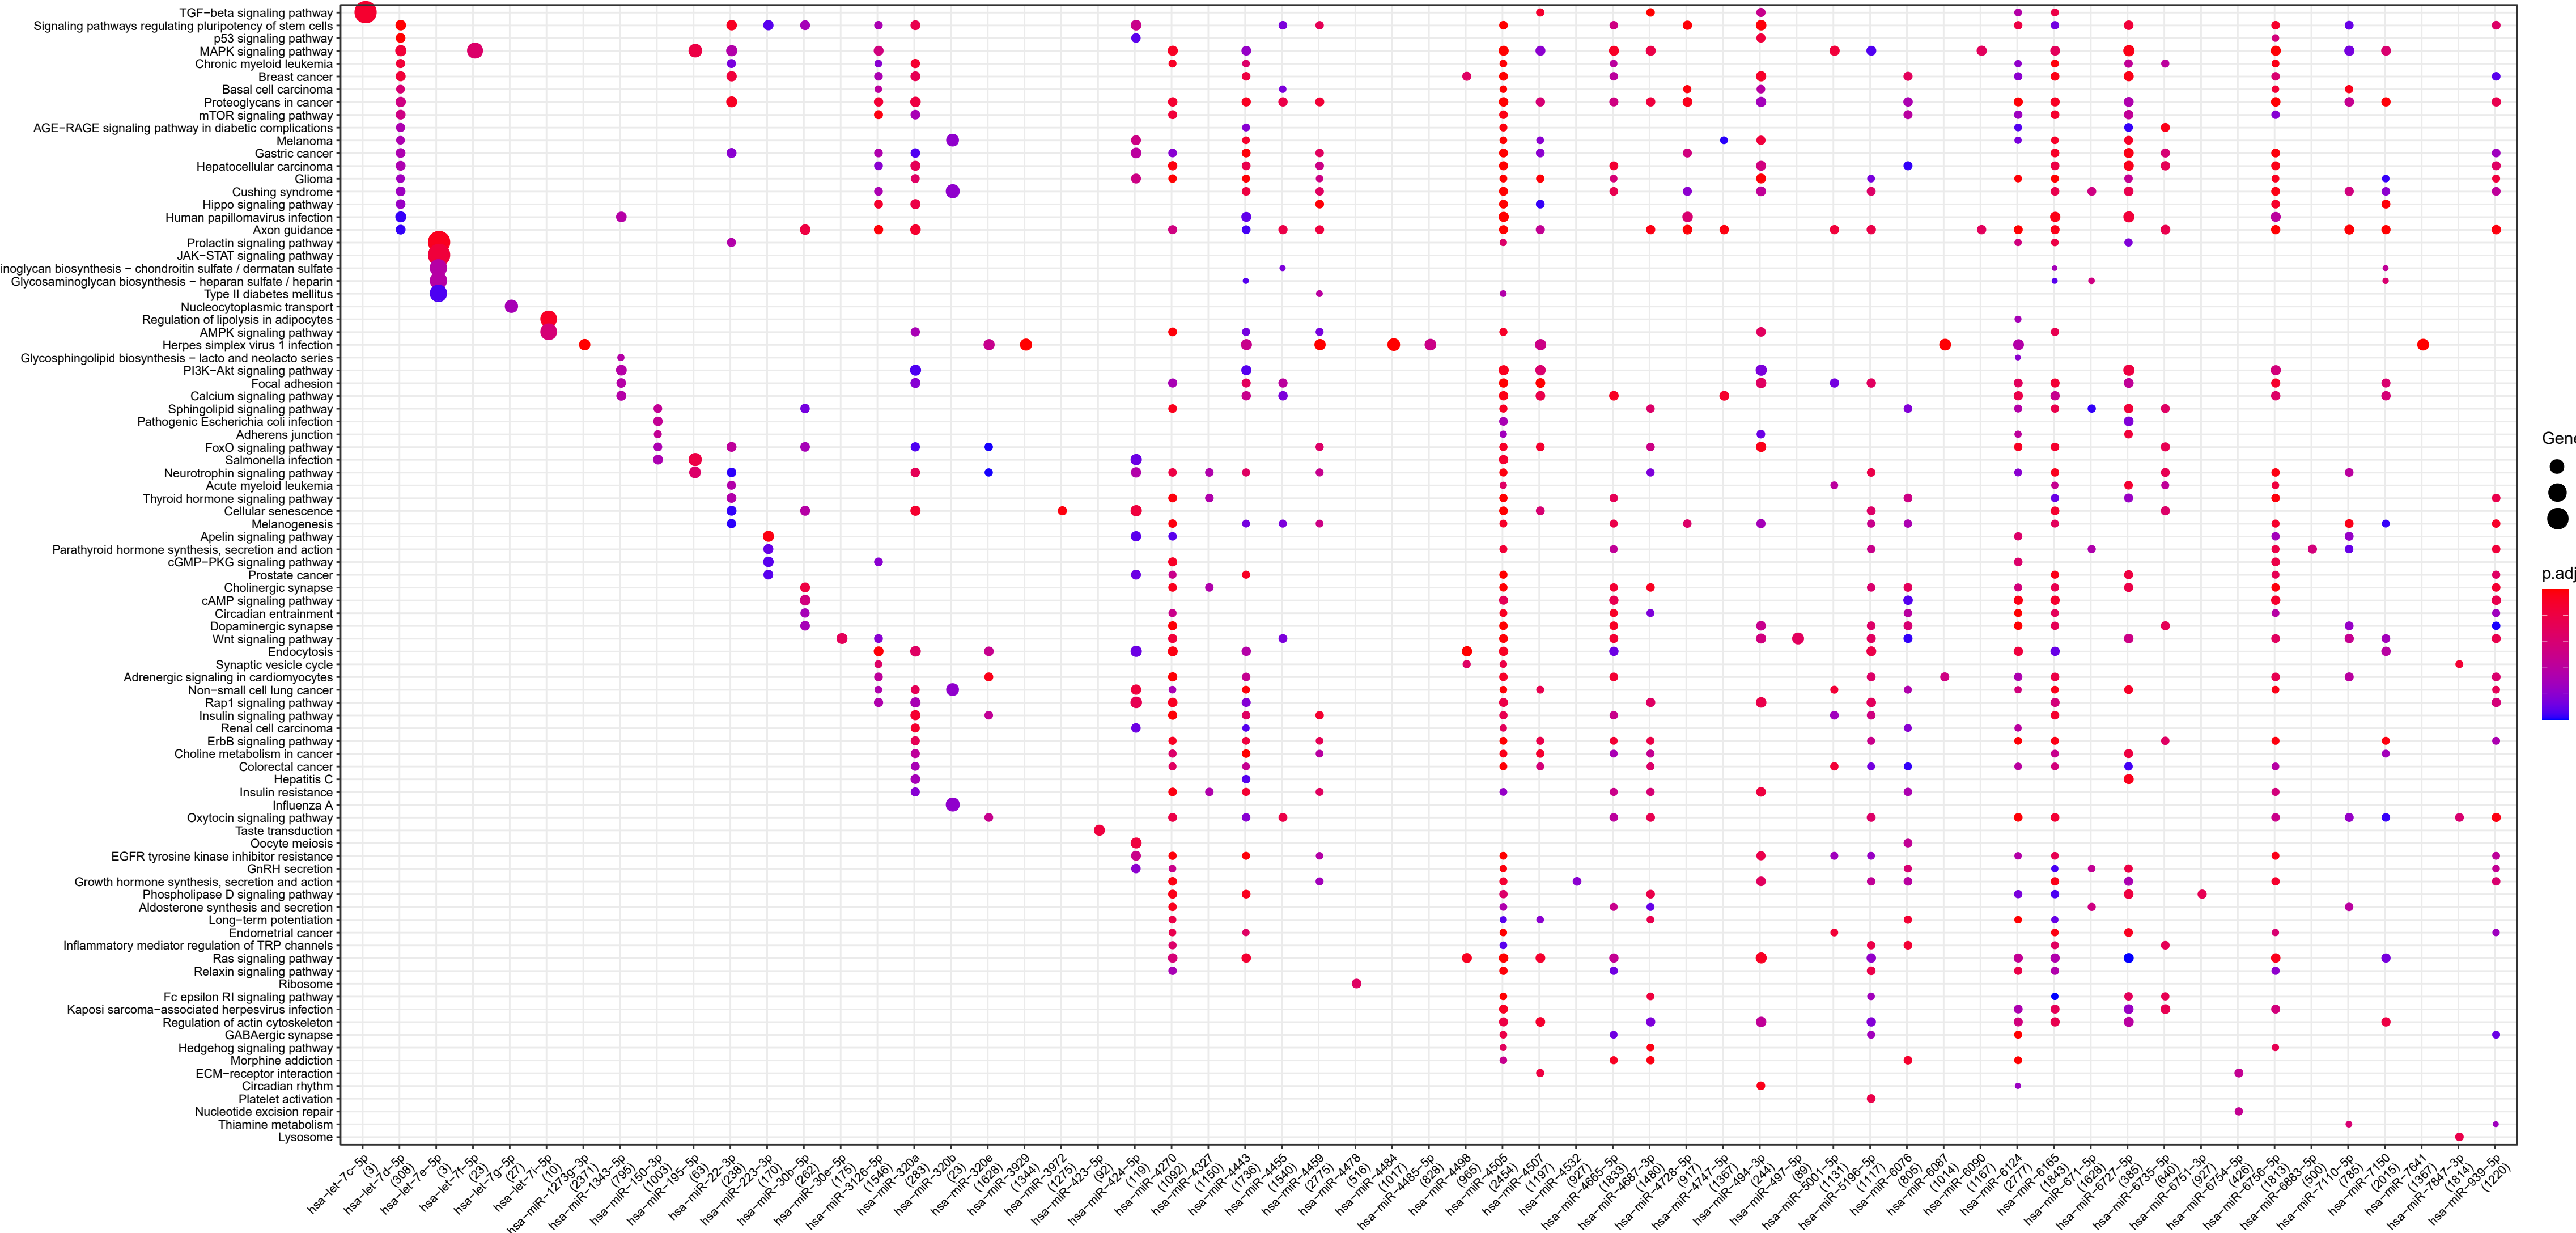

Supplement: f1 [file 9652169.f1.pdf]
